# Supplementary material for: Metagenomic Analysis of the Effects of Lactiplantibacillus plantarum and Fructooligosaccharides (FOS) on the Fecal Microbiota Structure in Mice
Source: MDPI journal article supplement (doi:10.3390/foods11091187), 2022-04-19
Supplement: s1 [file s1]

## Supplementary Materials

### Supplementary Material 1:

**Table S1.** The detail composition of standard diet and FOS diet

| Nutritional Components | Standard diet (g/1000g) | FOS diet (g/1000g) |
|------------------------|-------------------------|--------------------|
| Casein                 | 200                     | 197.33             |
| Cornstarch             | 397.5                   | 392.18             |
| Dextrin                | 132                     | 130.23             |
| Soybean oil            | 70                      | 80.86              |
| Mineral mix            | 35                      | 29.81              |
| Vitamin mix            | 10                      | 8.52               |
| L-cystine              | 3.0                     | 2.56               |
| Choline chloride       | 2.5                     | 2.13               |
| Sucrose                | 150                     | 6.38               |
| FOS                    | 0                       | 150                |

## Supplementary Material 2:

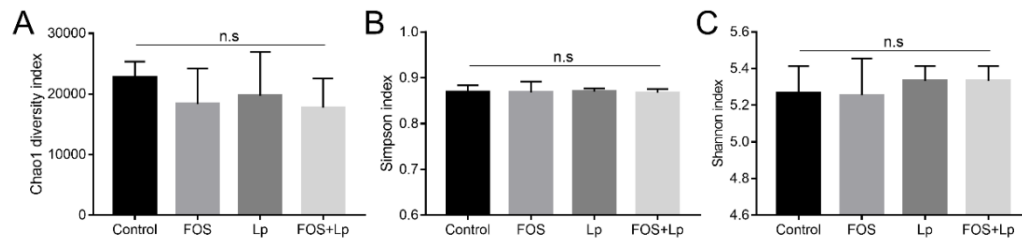

**Figure S1.** Alpha and beta diversity of intestinal microbiota among all group in the beginning of the experiment. Chao1 index (A), simpson index (B), and shannon index (C).

### Supplementary Material 3:

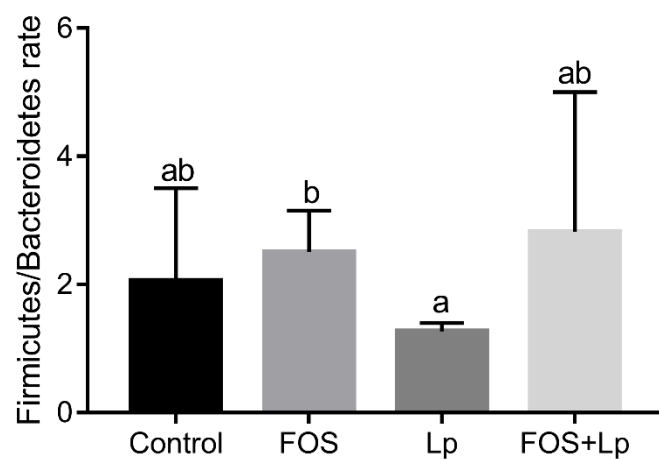

**Figure S2.** Influence of *L. plantarum* ST-III and FOS intervention on the ratio of Firmicutes and Bacteroidetes.

### Supplementary Material 4:

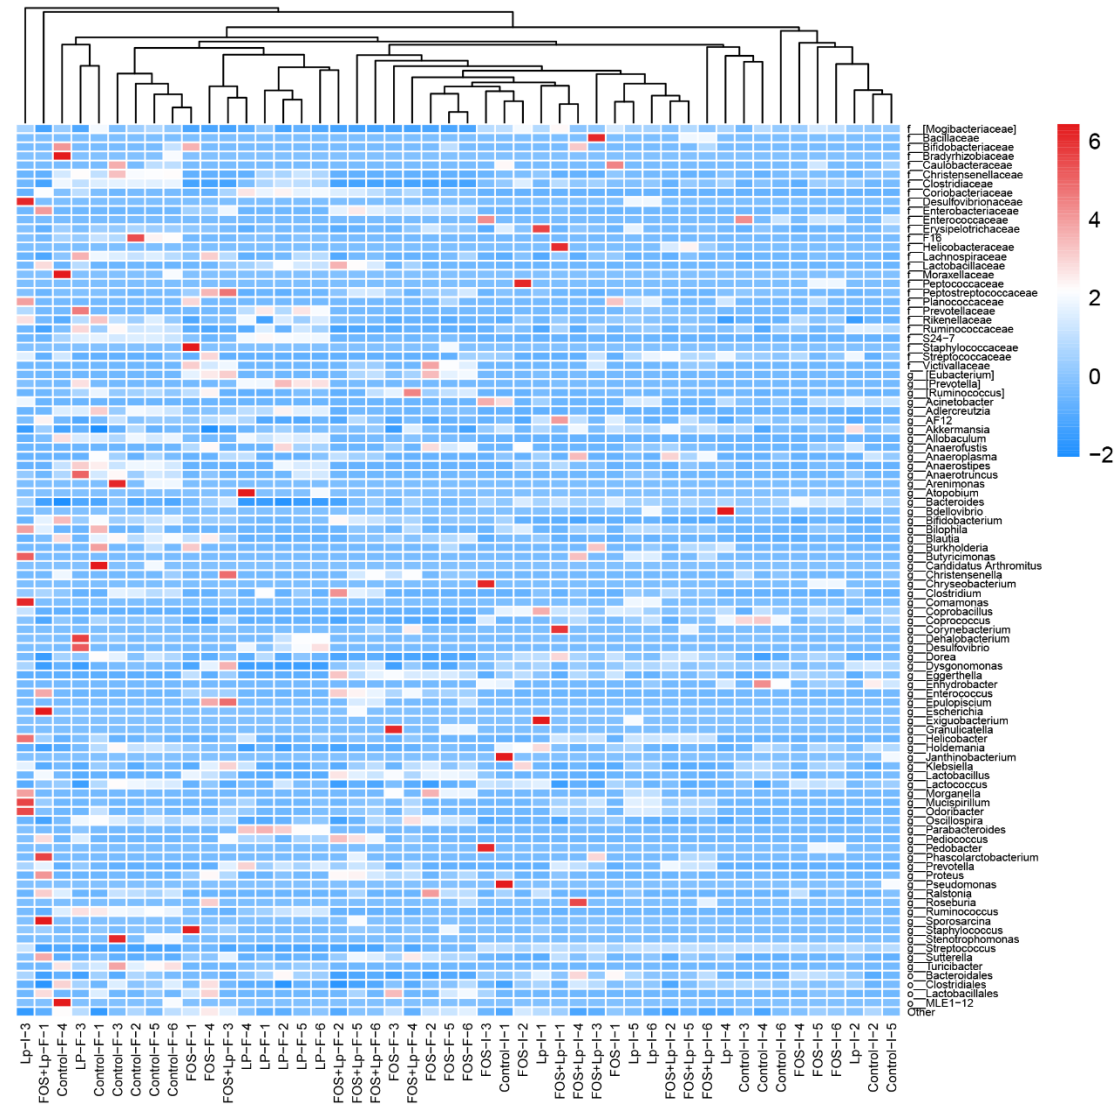

**Figure S3.** Influence of *L. plantarum* ST-III and FOS intervention on the relative abundance genera from each sample.

## Supplementary Material 5:

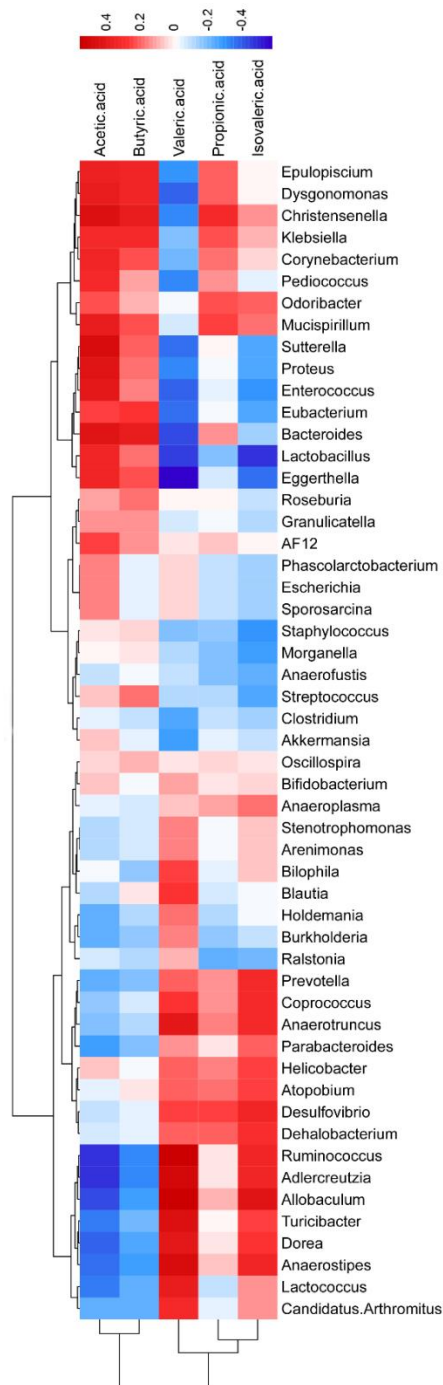

**Figure S4.** Heatmap presenting the association between genera and cecal SCFAs. Blue means positive association and red means negative association.
